# Supplementary material for: Lysine Methyltransferase 9 (KMT9) Is an Actionable Target in Muscle-Invasive Bladder Cancer
Source: MDPI journal article supplement (doi:10.3390/cancers16081532), 2024-04-17
Supplement: s1 [file s1]

Figure S1: Knockdown of KMT9α blocks proliferation, migration, and invasion of MIBC cell lines

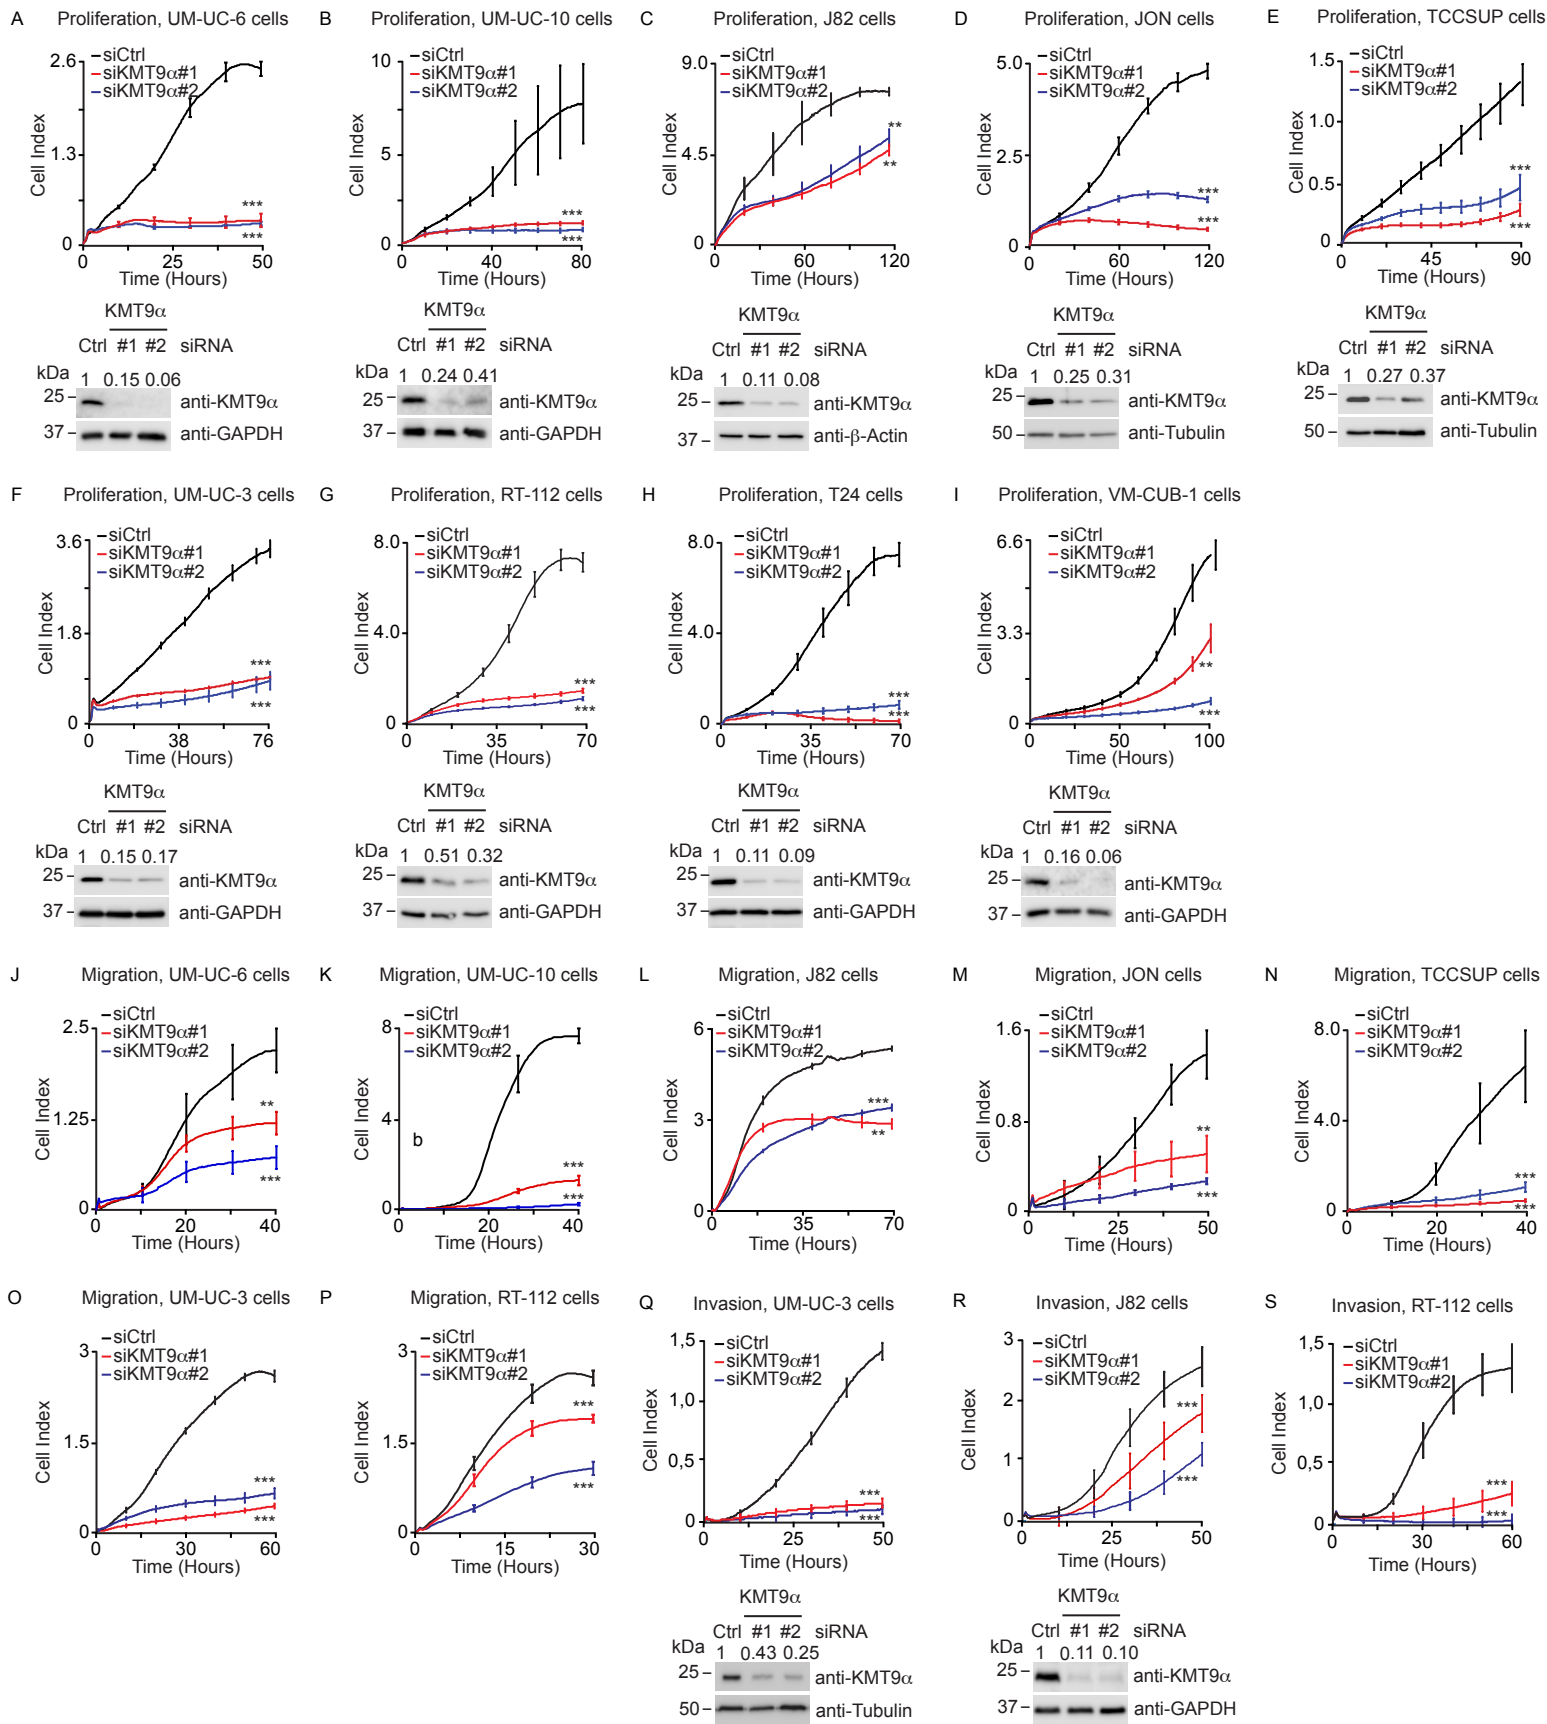

**Figure S1.** Knockdown of KMT9α blocks proliferation, migration and invasion of MIBC cell lines. **(A-I)** Real-time proliferation assays for **(A)** UM-UC-6, **(B)** UM-UC-10, **(C)** J82, **(D)** JON, **(E)** TCCSUP, **(F)** UM-UC-3, **(G)** RT-112, **(H)** T24 and **(I)** VM-CUB-1 cells after transfection with siCtrl, siKMT9α#1, or siKMT9α#2. **(J-P)** Real-time migration assays for **(J)** UM-UC-6, **(K)** UM-UC-10, **(L)** J82, **(M)** JON, **(N)** TCCSUP **(O)** UM-UC-3 and **(P)** RT-112 cells after transfection with the above-mentioned siRNAs and overnight starvation in serum-free medium. **(Q-S)** Real-time invasion assays for **(Q)** UM-UC-3, **(R)** J82 and **(S)** RT-112 cells after transfection with the above-mentioned siRNAs and overnight starvation in serum-free medium. **(A-S)** A representative experiment for each cell line is shown, displaying the mean  $\pm$  standard deviation derived from four technical replicates. Each experiment was independently conducted at least three times. Statistical significance was calculated by two-tailed Student t test (\*\*,  $p < 0.01$ ; \*\*\*,  $p < 0.001$ ). **(A-I,Q,R)** Western blot analyses using the indicated antibodies were done to confirm knockdown of KMT9α. The intensity of each protein band was quantified by densitometry and normalized to the intensity of the house keeping gene. The siCtrl value was set to 1. **(A-G)** Western blots represent the knockdown for proliferation **(A-G)** and migration assays **(J-P)** as well as the invasion assay of RT-112 cells **(S)** since the same batch of cells was used. **(A-I,Q,R)** The original Western blots with molecular weight markers and original data of densitometry scans are presented in Figures S3 and S4.

Figure S2: Knockdown of KMT9α induces gene expression changes in MIBC cell lines

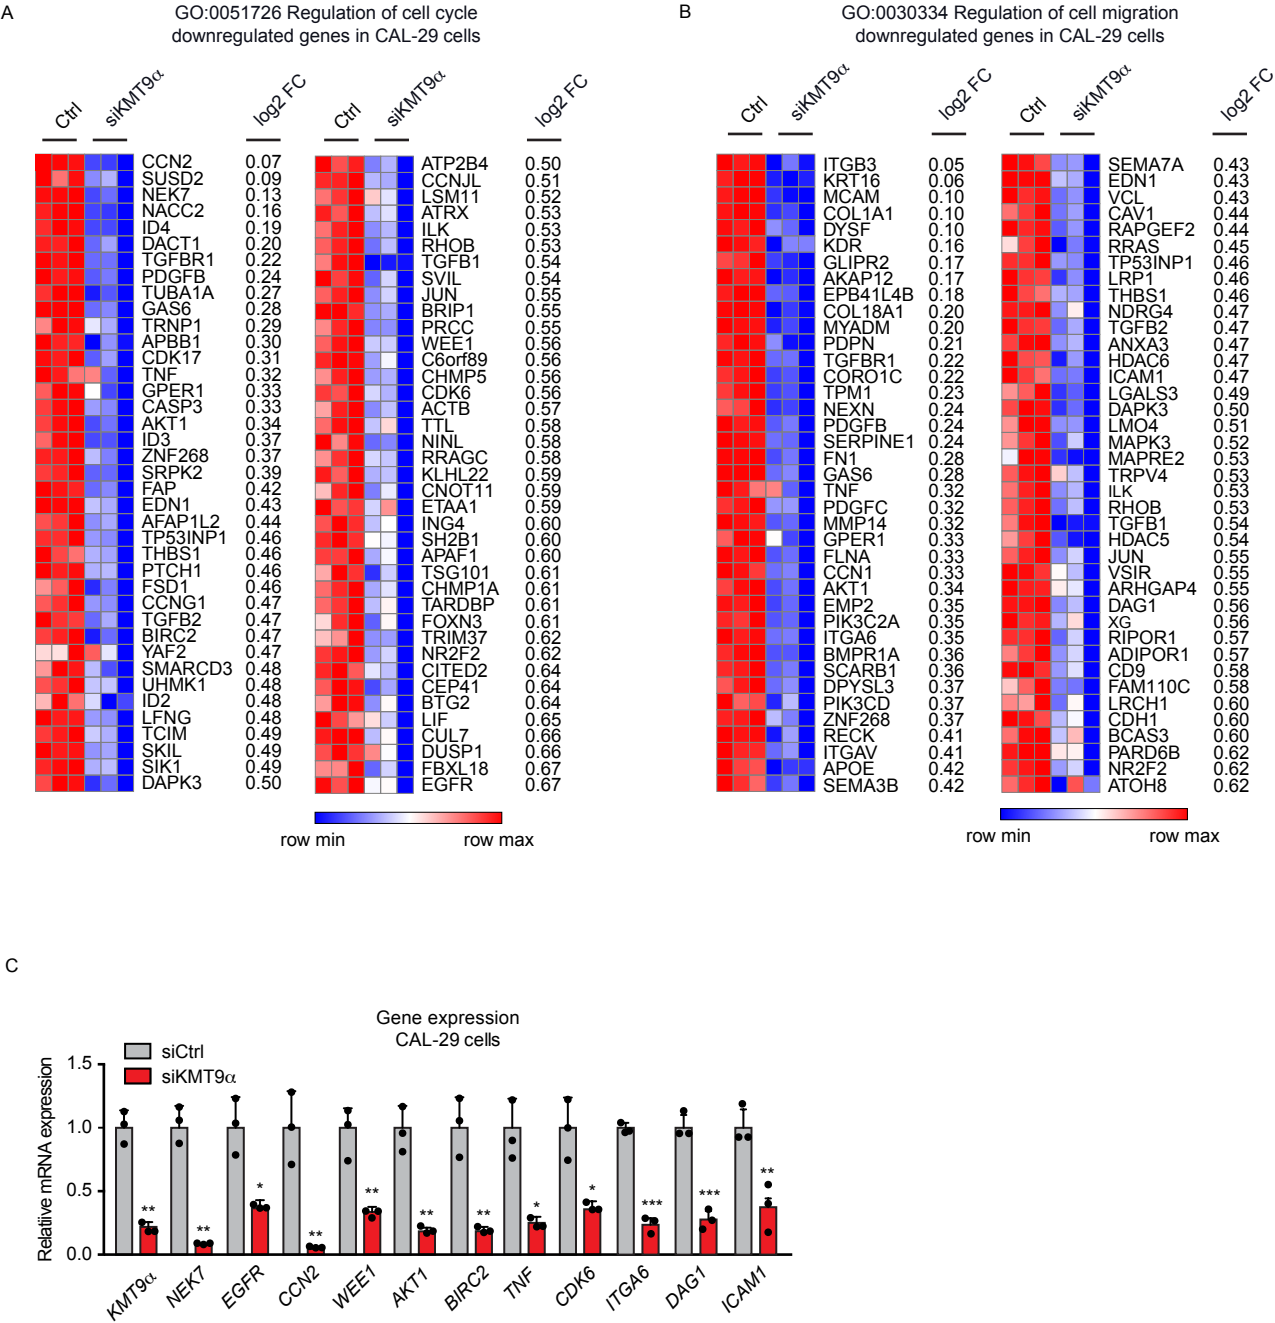

**Figure S2.** Knockdown of KMT9α induces gene expression changes in MIBC cell lines. **(A)** Heat map displaying relative mRNA levels of genes involved in "regulation of cell cycle" (GO:0051726) in CAL-29 cells treated with siCtrl or siKMT9α. **(B)** Heat map displaying relative mRNA levels of genes involved in "regulation of cell migration" (GO:0030334) in CAL-29 cells treated with siCtrl or siKMT9α. **(C)** Quantitative real-time PCR analysis of mRNA expression for selected genes presented in **(A)** and **(B)** after knockdown of KMT9α. Data represent means + standard deviation. Statistical significance was calculated by two-tailed Student t test (\* p < 0.05, \*\* p < 0.01; \*\*\*, p < 0.001), n = 3.

**Figure 1A** Human patient-matched bladder tissue KMT9 $\alpha$ / $\beta$  protein expression

kDa 75 50 37 25 20 15 10

anti- $\beta$ -Actin

anti-KMT9 $\alpha$

anti-KMT9 $\beta$

**Figure S1G** RT-112 KMT9 $\alpha$

kDa Ctrl #1 #2 5637 CAL-29 HT-1376 UM-UC-3 J82

anti-GAPDH

anti-KMT9 $\alpha$

anti-KMT9 $\beta$

**Figure 1C** 5637 KMT9 $\alpha$

siRNA Ctrl #1 #2 kDa

anti-KMT9 $\alpha$  25 20

anti-GAPDH 50 37

**Figure S1H** T24 KMT9 $\alpha$

siRNA Ctrl #1 #2 kDa

anti-KMT9 $\alpha$  25 20

anti-GAPDH 50 37

**Figure 1D** CAL-29 KMT9 $\alpha$

siRNA Ctrl #1 #2 kDa

anti-KMT9 $\alpha$  25 20

anti-GAPDH 50 37

**Figure 1E** HT-1376 cells KMT9 $\alpha$

siRNA Ctrl #1 #2 kDa

anti-Tubulin 75 50

anti-KMT9 $\alpha$  25 20

**Figure 1I** Invasion 5637 KMT9 $\alpha$

kDa Ctrl #1 #2 siRNA

anti-KMT9 $\alpha$  20

anti-Tubulin 50 37

**Figure 1J** Invasion CAL-29 KMT9 $\alpha$

siRNA Ctrl #1 #2 kDa

anti-KMT9 $\alpha$  25 20

anti-Tubulin 75 50

**Figure S1Q** Invasion UM-UC-3 KMT9 $\alpha$

siRNA Untreated Ctrl #1 #2 kDa

anti-KMT9 $\alpha$  25 20

anti-tubulin 75 50

**Figure 1K** UM-UC-6 KMT9 $\alpha$

siRNA Untreated Ctrl #1 #2 kDa

anti-KMT9 $\alpha$  25 20

anti-tubulin 75 50

**Figure 2I** 5637 KMT9 $\alpha$

kDa siCtrl siKMT9 $\alpha$  #1 siKMT9 $\alpha$  #2

anti-KMT9 $\alpha$  25 20

anti-EGFR 150

anti-AKT 50

anti-Tubulin 50

**Figure 2I** CAL-29 KMT9 $\alpha$

kDa siCtrl siKMT9 $\alpha$  #1 siKMT9 $\alpha$  #2

anti-KMT9 $\alpha$  25

anti-EGFR 150

anti-AKT 75 50

anti-GAPDH 37

**Figure 3B** Bladder organoids

kDa Ctrl Pten/Trp53 KO Pten/Trp53/KMT9 $\alpha$  KO Pten/Trp53/KMT9 $\alpha$  N22A KI

anti-KMT9 $\alpha$  25 20

anti-TRP53 75

anti-PTEN 50

anti- $\beta$ -Actin 37

**Figure 4A** 5637 KMT9 $\alpha$

miRNA Ctrl miRNA KMT9 $\alpha$

anti-KMT9 $\alpha$  25 20

anti-GAPDH 50 37

**Figure S1A** UM-UC-6 KMT9 $\alpha$

kDa Ctrl #1 #2 siRNA

anti-KMT9 $\alpha$  25 20

anti-GAPDH 50

**Figure S1B** UM-UC-10 KMT9 $\alpha$

kDa Ctrl #1 #2 siRNA

anti-KMT9 $\alpha$  25

anti-GAPDH 50 37

**Figure S1C** J82 KMT9 $\alpha$

kDa Ctrl #1 #2 siRNA

anti-KMT9 $\alpha$  25 20

anti- $\beta$ -Actin 37

**Figure S1D** JON KMT9 $\alpha$

siRNA Ctrl #1 #2 kDa

anti-KMT9 $\alpha$  25 20

anti-Tubulin 50

**Figure S1E** TCCSUP KMT9 $\alpha$

siRNA Ctrl #1 #2 kDa

anti-KMT9 $\alpha$  25 20

anti-Tubulin 75 50

**Figure S1F** UM-UC-3 KMT9 $\alpha$

kDa Ctrl #1 #2 siRNA

anti-KMT9 $\alpha$  25 20

anti-GAPDH 37

**Figure S1I** VM-CUB1 KMT9 $\alpha$

kDa Ctrl #1 #2 siRNA

anti-KMT9 $\alpha$  25 20

anti-GAPDH 37

**Figure S1R** Invasion J82 KMT9 $\alpha$

Ctrl #1 #2 kDa

anti-KMT9 $\alpha$  25 20

anti-GAPDH 37

Figure S4: Original densitometry data

Figure 1A

|                | #1         |            | #2         |            | #3         |            | #4         |            |
|----------------|------------|------------|------------|------------|------------|------------|------------|------------|
| Band intensity | healthy    | tumor      | healthy    | tumor      | healthy    | tumor      | healthy    | tumor      |
| β-Actin        | 46,822,614 | 62,228,340 | 44,319,426 | 51,067,269 | 44,880,536 | 62,592,516 | 51,026,506 | 77,247,789 |
| KMT9α          | 24,857,561 | 42,428,975 | 5,781,084  | 39,645,192 | 31,187,000 | 55,200,847 | 17,094,149 | 41,186,843 |
| KMT9β          | 46,822,614 | 62,228,340 | 44,319,426 | 51,067,269 | 44,880,536 | 62,592,516 | 51,026,506 | 77,247,789 |

|                | #5         |            | #6         |            | #7         |            | #8         |            |
|----------------|------------|------------|------------|------------|------------|------------|------------|------------|
| Band intensity | healthy    | tumor      | healthy    | tumor      | healthy    | tumor      | healthy    | tumor      |
| β-Actin        | 42,651,732 | 50,631,010 | 43,901,706 | 62,094,837 | 44,095,897 | 53,853,668 | 38,456,748 | 80,636,822 |
| KMT9α          | 23,602,812 | 69,457,543 | 17,305,402 | 28,912,022 | 21,337,852 | 27,703,346 | 25,423,824 | 49,255,319 |
| KMT9β          | 16,011,577 | 85,314,782 | 19,482,296 | 36,309,837 | 19,323,544 | 74,282,778 | 21,990,933 | 54,528,678 |

Figure 1B

| Band intensity | 5637       | CAL-29     | HT-1376    | UM-UC-3    | J82        |
|----------------|------------|------------|------------|------------|------------|
| GAPDH          | 39,802,104 | 47,465,136 | 31,135,293 | 48,976,896 | 23,566,193 |
| KMT9α          | 17,062,230 | 7,723,878  | 12,360,929 | 20,769,455 | 4,200,927  |
| KMT9β          | 43,474,000 | 4,954,577  | 2,722,839  | 7,717,427  | 7,837,986  |

Figure 1C

| Band intensity | siCtrl     | siKMT9α #1 | siKMT9α #2 |
|----------------|------------|------------|------------|
| KMT9α          | 1,596,187  | 385,704    | 415,541    |
| GAPDH          | 19,214,006 | 19,791,369 | 16,593,005 |

Figure 1D

| Band intensity | siCtrl     | siKMT9α #1 | siKMT9α #2 |
|----------------|------------|------------|------------|
| KMT9α          | 47,496,028 | 8,518,916  | 11,964,347 |
| GAPDH          | 49633,557  | 54,951,858 | 63,598,368 |

Figure 1E

| Band intensity | siCtrl     | siKMT9α #1 | siKMT9α #2 |
|----------------|------------|------------|------------|
| KMT9α          | 27,636,916 | 8,538,748  | 3,911,129  |
| Tubulin        | 65,584,512 | 89,177,664 | 85,136,653 |

Figure 1I

| Band intensity | siCtrl    | siKMT9α #1 | siKMT9α #2 |
|----------------|-----------|------------|------------|
| KMT9α          | 7,817,037 | 3,324,063  | 2,238,016  |
| GAPDH          | 4,678,613 | 11,717,871 | 4,560,766  |

Figure 1J

| Band intensity | siCtrl     | siKMT9α #1 | siKMT9α #2 |
|----------------|------------|------------|------------|
| KMT9α          | 57,181,408 | 16,424,503 | 14,297,532 |
| Tubulin        | 34,722,040 | 32,230,642 | 35,842,542 |

Figure 1K

| Band intensity | siCtrl     | siKMT9α #1 | siKMT9α #2 |
|----------------|------------|------------|------------|
| KMT9α          | 10,306,471 | 2,680,510  | 2,462,317  |
| Tubulin        | 41,364,780 | 43,336,209 | 33,310,376 |

Figure 2I (left)

| Band intensity | siCtrl     | siKMT9α #1 | siKMT9α #2 |
|----------------|------------|------------|------------|
| Tubulin        | 48,953,399 | 47,101,267 | 44,894,550 |
| KMT9α          | 61,793,754 | 16,171,794 | 7,975,738  |
| EGFR           | 79,476,418 | 29,913,523 | 9,857,714  |
| AKT1           | 37,002,053 | 10,664,857 | 9,030,927  |

Figure 2I (right)

| Band intensity | siCtrl     | siKMT9α #1 | siKMT9α #2 |
|----------------|------------|------------|------------|
| GAPDH          | 29,199,794 | 33,375,034 | 31,766,324 |
| KMT9α          | 13,017,508 | 5,714,838  | 8,856,652  |
| EGFR           | 42,562,692 | 4,840,341  | 8,349,338  |
| AKT1           | 9,861,695  | 1,744,134  | 4,237,722  |

Figure 3B

| Band intensity | Ctrl       | <i>Pten/Trp53</i> KO | <i>Pten/Trp53/Kmt9α</i> KO | <i>Pten/Trp53 KO/Kmt9αN122A</i> KI |
|----------------|------------|----------------------|----------------------------|------------------------------------|
| β-Actin        | 31,774,647 | 24,536,859           | 29,586,072                 | 27,687,000                         |
| TRP53          | 7,376,589  | 0                    | 0                          | 0                                  |
| PTEN           | 54,198,994 | 0                    | 0                          | 0                                  |
| KMT9α          | 23,825,771 | 15,153,552           | 0                          | 56,001,540                         |

Figure 4A

| Band intensity | miRNA Ctrl | miRNA KMT9α |
|----------------|------------|-------------|
| KMT9α          | 64,782,872 | 29,881,665  |
| GAPDH          | 68,332,363 | 52,927,940  |

Figure S1A

| Band intensity | siCtrl     | siKMT9α #1 | siKMT9α #2 |
|----------------|------------|------------|------------|
| KMT9α          | 35,879,610 | 5,168,882  | 2,979,210  |
| GAPDH          | 37,922,524 | 37,576,470 | 54,295,404 |

Figure S1B

| Band intensity | siCtrl     | siKMT9α #1 | siKMT9α #2 |
|----------------|------------|------------|------------|
| KMT9α          | 46,670,931 | 9,494,632  | 17,580,147 |
| GAPDH          | 57,661,179 | 48,072,360 | 52,878,086 |

Figure S1C

| Band intensity | siCtrl     | siKMT9α #1 | siKMT9α #2 |
|----------------|------------|------------|------------|
| KMT9α          | 11,406,688 | 1,422,752  | 1,449,608  |
| β-Actin        | 17,679,415 | 20,884,077 | 27,892,916 |

Figure S1D

| Band intensity | siCtrl     | siKMT9α #1 | siKMT9α #2 |
|----------------|------------|------------|------------|
| KMT9α          | 49,179,177 | 16,254,502 | 28,983,339 |
| Tubulin        | 15,158,877 | 19,965,719 | 28,703,748 |

Figure S1E

| Band intensity | siCtrl     | siKMT9α #1 | siKMT9α #2 |
|----------------|------------|------------|------------|
| KMT9α          | 49,678,431 | 16,011,267 | 28,912,785 |
| GAPDH          | 43,315,744 | 51,754,811 | 68,796,409 |

Figure S1F

| Band intensity | siCtrl     | siKMT9α #1 | siKMT9α #2 |
|----------------|------------|------------|------------|
| KMT9α          | 53,372,167 | 8,662,005  | 10,208,604 |
| GAPDH          | 53,172,647 | 56,044,237 | 60,045,620 |

Figure S1G

| Band intensity | siCtrl     | siKMT9α #1 | siKMT9α #2 |
|----------------|------------|------------|------------|
| KMT9α          | 40,057,215 | 15,192,041 | 9,327,888  |
| GAPDH          | 37,866,443 | 28,325,897 | 27,646,903 |

Figure S1H

| Band intensity | siCtrl     | siKMT9α #1 | siKMT9α #2 |
|----------------|------------|------------|------------|
| KMT9α          | 91,437,333 | 10,272,474 | 8,412,143  |
| GAPDH          | 53,584,869 | 55,769,147 | 56,175,640 |

Figure S1I

| Band intensity | siCtrl     | siKMT9α #1 | siKMT9α #2 |
|----------------|------------|------------|------------|
| KMT9α          | 62,486,208 | 10,113,461 | 3,405,122  |
| GAPDH          | 88,244,870 | 87,862,070 | 78,638,270 |

Figure S1Q

| Band intensity | siCtrl     | siKMT9α #1 | siKMT9α #2 |
|----------------|------------|------------|------------|
| KMT9α          | 13,745,131 | 4,632,425  | 4,074,992  |
| Tubulin        | 41,033,504 | 32,047,437 | 47,754,416 |

Figure S1R

| Band intensity | siCtrl     | siKMT9α #1 | siKMT9α #2 |
|----------------|------------|------------|------------|
| KMT9α          | 24,118,568 | 2,594,596  | 2,861,270  |
| GAPDH          | 44,253,751 | 44,273,708 | 52,697,727 |
